# Supplementary material for: Minimal important differences of EORTC QLQ-C30 for metastatic breast cancer patients: Results from a randomized clinical trial
Source: PubMed Central journal article supplement (PMC9098551; doi:10.1007/s11136-021-03074-y), 2022-01-04
Supplement: 11136_2021_3074_MOESM1_ESM.pdf [file 11136_2021_3074_MOESM1_ESM.pdf]

Supplementary Table 1. The number of patients by anchor categories and corresponding mean change in QOL scores

| Anchor   | Scale         | 2 months |        |       | 4 months |        |       | 6 months |        |       |
|----------|---------------|----------|--------|-------|----------|--------|-------|----------|--------|-------|
|          |               | Imp      | Stable | Det   | Imp      | Stable | Det   | Imp      | Stable | Det   |
| Function |               |          |        |       |          |        |       |          |        |       |
|          | N of patients | 12       | 57–59  | 24–26 | 13       | 52–54  | 21–22 | 6–7      | 50–52  | 14–15 |
|          | QL            | 22.2     | -0.3   | -5.8  | 7.7      | 0.6    | -1.9  | 4.8      | 5.8    | -12.8 |
|          | PF            | 10.0     | 2.6    | -5.6  | 10.0     | 2.2    | -4.6  | 1.9      | 3.5    | -9.6  |
|          | RF            | 6.9      | 0.0    | -10.3 | 1.3      | -3.1   | -3.0  | -2.4     | 1.3    | -18.9 |
|          | EF            | 2.8      | 11.3   | 11.2  | 11.1     | 9.9    | 6.8   | 6.0      | 10.9   | 0.2   |
|          | CF            | 1.4      | 5.6    | 5.1   | 5.1      | 1.9    | -0.8  | -4.8     | 4.5    | -11.1 |
|          | SF            | 2.8      | 3.4    | 5.1   | 9.0      | 2.2    | 0.8   | -9.5     | 4.2    | -11.1 |
|          | FA            | -5.6     | -0.9   | 5.1   | -6.8     | 0.0    | 8.1   | 0.0      | -6.0   | 5.9   |
|          | NV            | -11.1    | 0.8    | 3.2   | 7.7      | 0.6    | -4.5  | 16.7     | -4.6   | 6.7   |
|          | PA            | -8.3     | -4.2   | 1.9   | -1.3     | -4.0   | -0.8  | 0.0      | -9.9   | -3.3  |
|          | DY            | -8.3     | -3.4   | 5.1   | 0.0      | -2.5   | 0.0   | 0.0      | -5.8   | 11.1  |
|          | SL            | -16.7    | -10.3  | -8.0  | -10.3    | -14.2  | 1.6   | 0.0      | -7.7   | 15.6  |
|          | AP            | -8.3     | 1.7    | 7.7   | 7.7      | -0.6   | 1.5   | 9.5      | -8.3   | 4.4   |
|          | CO            | -5.6     | 3.4    | 5.1   | -2.6     | 3.1    | 10.6  | 4.8      | -0.6   | 6.7   |
|          | DI            | 11.1     | 5.6    | 3.8   | 10.3     | 5.6    | 3.2   | 4.8      | 5.2    | -6.7  |
|          | FI            | -13.9    | 0.0    | -18.1 | -20.5    | -7.1   | 3.0   | 14.3     | -2.7   | -9.5  |
| Concern  |               |          |        |       |          |        |       |          |        |       |
|          | N of patients | 21–23    | 59–62  | 23    | 20–21    | 44–45  | 18–19 | 17       | 52–55  | 14    |
|          | QL            | 9.1      | 1.5    | -4.0  | 8.7      | 0.6    | -1.8  | 14.2     | 3.0    | -6.0  |
|          | PF            | -1.5     | 3.0    | -0.3  | 5.1      | 1.6    | -7.0  | 7.1      | 3.6    | -5.5  |
|          | RF            | -0.7     | -1.1   | -2.9  | 0.0      | -1.9   | -7.0  | 19.6     | -1.5   | -16.7 |
|          | EF            | 10.5     | 7.3    | 9.1   | 13.1     | 11.7   | 3.5   | 19.3     | 7.7    | 0.6   |
|          | CF            | -2.2     | 3.0    | 10.9  | -2.4     | 4.8    | -3.5  | 7.8      | 0.0    | 1.2   |
|          | SF            | 3.6      | 2.2    | 7.2   | 12.7     | 2.6    | -9.6  | 6.9      | 3.1    | -10.7 |

|    |       |      |       |       |       |      |       |      |      |
|----|-------|------|-------|-------|-------|------|-------|------|------|
| FA | -1.9  | -2.7 | 0.5   | -5.8  | -0.9  | 5.8  | -15.7 | -4.2 | 1.6  |
| NV | 4.3   | 1.3  | -5.1  | 1.6   | 2.6   | -1.8 | -7.8  | -3.1 | 4.8  |
| PA | -5.1  | -3.8 | -1.4  | -7.9  | -3.3  | 7.9  | -21.6 | -5.8 | -2.4 |
| DY | -1.4  | -0.5 | -4.3  | -4.8  | -3.7  | -3.5 | -19.6 | 1.8  | 0.0  |
| SL | -13.0 | -8.7 | -13.6 | -9.5  | -14.1 | 0.0  | -15.7 | -6.8 | 0.0  |
| AP | -1.4  | 2.2  | 0.0   | 0.0   | -1.5  | 12.3 | -7.8  | -2.4 | -2.4 |
| CO | -5.8  | 3.8  | 4.3   | -1.7  | 2.2   | 5.3  | 7.8   | 0.6  | 2.4  |
| DI | 10.1  | 2.2  | 5.8   | 7.9   | 3.7   | 17.5 | -3.9  | 7.4  | 7.1  |
| FI | -3.2  | -7.3 | -5.8  | -14.3 | -6.8  | -3.5 | -5.9  | -8.3 | -2.4 |

Global Health

|               |       |       |       |       |       |       |       |       |       |
|---------------|-------|-------|-------|-------|-------|-------|-------|-------|-------|
| N of patients | 22–23 | 53–57 | 30–31 | 20–22 | 41–42 | 25–26 | 18    | 37–39 | 25–26 |
| QL            | 7.6   | 3.8   | -8.1  | 6.4   | 3.8   | -6.7  | 13.4  | 1.3   | -4.2  |
| PF            | 8.0   | 1.8   | -4.1  | 6.9   | -0.4  | -1.8  | 8.1   | 0.2   | 1.2   |
| RF            | 5.1   | 3.5   | -13.4 | 6.8   | -3.2  | -8.3  | 13.0  | -6.0  | -6.4  |
| EF            | 6.5   | 12.1  | 7.0   | 17.3  | 11.2  | 4.8   | 13.4  | 7.9   | 4.6   |
| CF            | 1.4   | 4.1   | 4.3   | -3.0  | 3.2   | 3.2   | 1.9   | 5.1   | -2.6  |
| SF            | 15.9  | 5.3   | -2.7  | 2.4   | 1.6   | 5.1   | 11.1  | 3.8   | -7.1  |
| FA            | -7.7  | -3.5  | 5.7   | -3.3  | -2.2  | 4.7   | -9.9  | -1.6  | -4.3  |
| NV            | -5.8  | 1.5   | 8.6   | 0.8   | -0.8  | 3.2   | -9.3  | -1.3  | 1.9   |
| PA            | -11.6 | -3.2  | 2.7   | -8.3  | -6.0  | 5.8   | -19.4 | -5.1  | -7.1  |
| DY            | -14.5 | -1.2  | 2.2   | 0.0   | -3.2  | -3.8  | -5.6  | -2.6  | 0.0   |
| SL            | 0.0   | -12.5 | -8.9  | -13.6 | -6.3  | -4.0  | -20.4 | 0.0   | -2.7  |
| AP            | -10.1 | -0.6  | 17.2  | -4.5  | 0.8   | 12.8  | -5.6  | -3.4  | 5.1   |
| CO            | 0.0   | 1.8   | 4.3   | -3.0  | 4.9   | 11.5  | -3.7  | 0.9   | -2.6  |
| DI            | 1.4   | 5.3   | 6.5   | 14.3  | 3.2   | 5.1   | -1.9  | 2.6   | 6.4   |
| FI            | -15.2 | -4.4  | -10.8 | -6.7  | -5.7  | -11.5 | -14.8 | -6.3  | -2.6  |

Change in Performance Status

|               |   |         |       |   |       |       |   |       |    |
|---------------|---|---------|-------|---|-------|-------|---|-------|----|
| N of patients | 7 | 103–104 | 14–17 | 6 | 96–98 | 14–15 | 7 | 79–81 | 20 |
|---------------|---|---------|-------|---|-------|-------|---|-------|----|

|    |       |      |       |       |      |       |       |       |       |
|----|-------|------|-------|-------|------|-------|-------|-------|-------|
| QL | 31.0  | 1.7  | 8.8   | 29.2  | 3.3  | 0.0   | 23.8  | 4.5   | -4.6  |
| PF | 12.4  | 1.2  | 1.5   | -4.4  | 2.3  | -2.7  | 8.6   | 3.3   | -6.0  |
| RF | -2.4  | -1.1 | -3.9  | -2.8  | -0.9 | -2.2  | 11.9  | 2.7   | -11.7 |
| EF | 19.0  | 8.8  | 15.7  | 19.4  | 11.4 | 15.0  | 6.0   | 9.1   | 3.5   |
| CF | 0.0   | 3.7  | 2.9   | 8.3   | 3.1  | 0.0   | -2.4  | 2.7   | -5.8  |
| SF | 11.9  | 3.2  | 12.7  | 8.3   | 4.6  | -1.1  | 0.0   | 4.4   | -7.5  |
| FA | -9.5  | -1.6 | 0.0   | 5.6   | -3.5 | 2.2   | -11.1 | -4.4  | -0.6  |
| NV | 0.0   | 3.9  | -12.7 | 8.3   | -0.7 | 0.0   | 9.5   | -3.3  | -0.8  |
| PA | -23.8 | -5.3 | 1.0   | -2.8  | -7.8 | 2.2   | -2.4  | -12.3 | -5.0  |
| DY | -19.0 | -1.0 | -5.9  | 5.6   | -6.1 | 0.0   | 0.0   | -2.1  | -5.0  |
| SL | -9.5  | -9.2 | -13.7 | -16.7 | -8.5 | -11.9 | -9.5  | -7.5  | 5.0   |
| AP | -19.0 | 3.6  | -5.9  | -5.6  | 1.7  | -8.9  | -14.3 | -1.2  | -3.3  |
| CO | 4.8   | 2.2  | 2.0   | 0.0   | 3.1  | 23.8  | -23.8 | 0.4   | 20.0  |
| DI | 0.0   | 6.7  | 3.9   | 5.6   | 5.8  | 4.4   | 23.8  | 4.1   | 0.0   |
| FI | 4.8   | -5.5 | -4.8  | -5.6  | -8.0 | -4.4  | 14.3  | -6.3  | -6.7  |

Legend for Supplementary Table 1:

Because the number of patients varied by QOL scale and anchor, we present n as a range for all scales and anchors.

Imp, minimally improved; Det, minimally deteriorated; QL, global quality of life; PF, physical function; RF, role function; EF, emotional function; CF, cognitive function; SF, social function; FA, fatigue; NV, nausea and vomiting; PA, pain; DY, dyspnea; SL, insomnia; AP, appetite loss; CO, constipation; DI, diarrhea; FI, financial problems

Supplementary Table 2. Correlation coefficients of absolute, change, and baseline scores with anchors

| Months | Anchor   | Scale         | n     | Absolute score |       |       |       | Change score |       |       |       | Baseline score |       |       |       |  |
|--------|----------|---------------|-------|----------------|-------|-------|-------|--------------|-------|-------|-------|----------------|-------|-------|-------|--|
|        |          |               |       | Pe             | Sp    | Pc    | Ps    | Pe           | Sp    | Pc    | Ps    | Pe             | Sp    | Pc    | Ps    |  |
| 2      | Function |               |       |                |       |       |       |              |       |       |       |                |       |       |       |  |
|        |          | QL            | 130   | -0.32          | -0.33 | -0.38 | -0.37 | -0.37        | -0.39 | -0.39 | -0.38 | 0.13           | 0.08  | 0.09  | 0.10  |  |
|        |          | PF            | 129   | -0.16          | -0.16 | -0.19 | -0.21 | -0.30        | -0.40 | -0.38 | -0.33 | 0.08           | 0.13  | 0.10  | 0.07  |  |
|        |          | RF            | 129   | -0.11          | -0.13 | -0.17 | -0.17 | -0.27        | -0.25 | -0.31 | -0.31 | 0.12           | 0.06  | 0.07  | 0.11  |  |
|        |          | SF            | 130   | -0.20          | -0.16 | -0.26 | -0.27 | -0.28        | -0.24 | -0.31 | -0.29 | 0.10           | 0.02  | 0.04  | 0.06  |  |
|        |          | FA            | 129   | 0.24           | 0.26  | 0.30  | 0.31  | 0.33         | 0.30  | 0.34  | 0.34  | -0.04          | 0.05  | 0.02  | 0.00  |  |
|        |          | DY            | 128   | 0.11           | 0.13  | 0.16  | 0.15  | 0.31         | 0.29  | 0.35  | 0.33  | -0.17          | -0.12 | -0.17 | -0.16 |  |
|        |          | AP            | 128   | 0.35           | 0.33  | 0.43  | 0.41  | 0.34         | 0.37  | 0.39  | 0.37  | -0.08          | -0.07 | -0.08 | -0.06 |  |
|        |          | Concern       |       |                |       |       |       |              |       |       |       |                |       |       |       |  |
|        |          | QL            | 131   | -0.30          | -0.27 | -0.32 | -0.32 | -0.31        | -0.32 | -0.33 | -0.32 | 0.22           | 0.14  | 0.20  | 0.21  |  |
|        |          | Global Health |       |                |       |       |       |              |       |       |       |                |       |       |       |  |
|        |          | QL            | 131   | -0.32          | -0.33 | -0.34 | -0.34 | -0.45        | -0.40 | -0.46 | -0.46 | 0.01           | -0.01 | -0.01 | 0.00  |  |
|        |          | PF            | 130   | -0.07          | -0.12 | -0.11 | -0.11 | -0.32        | -0.39 | -0.38 | -0.34 | 0.03           | 0.10  | 0.04  | 0.02  |  |
|        |          | RF            | 130   | -0.03          | -0.10 | -0.08 | -0.07 | -0.26        | -0.25 | -0.29 | -0.30 | 0.04           | 0.09  | 0.05  | 0.03  |  |
|        |          | SF            | 131   | -0.15          | -0.14 | -0.18 | -0.20 | -0.32        | -0.33 | -0.37 | -0.36 | 0.00           | 0.02  | 0.00  | -0.01 |  |
|        |          | FA            | 130   | 0.11           | 0.19  | 0.18  | 0.16  | 0.31         | 0.34  | 0.37  | 0.34  | 0.01           | 0.03  | 0.04  | 0.03  |  |
|        |          | NV            | 130   | 0.11           | 0.13  | 0.14  | 0.12  | 0.24         | 0.28  | 0.31  | 0.26  | -0.04          | -0.07 | -0.08 | -0.04 |  |
|        |          | PA            | 131   | 0.05           | 0.10  | 0.09  | 0.08  | 0.35         | 0.30  | 0.35  | 0.35  | -0.10          | -0.15 | -0.13 | -0.10 |  |
|        |          | DY            | 129   | 0.00           | 0.03  | 0.03  | 0.03  | 0.30         | 0.25  | 0.33  | 0.33  | -0.05          | -0.04 | -0.04 | -0.04 |  |
|        | AP       | 129           | 0.18  | 0.22           | 0.23  | 0.21  | 0.31  | 0.37         | 0.36  | 0.34  | -0.04 | -0.05          | -0.04 | -0.03 |       |  |
| 4      | Function |               |       |                |       |       |       |              |       |       |       |                |       |       |       |  |
|        |          | QL            | 121   | -0.49          | -0.45 | -0.56 | -0.53 | -0.39        | -0.36 | -0.40 | -0.40 | -0.10          | -0.10 | -0.14 | -0.13 |  |
|        |          | PF            | 121   | -0.45          | -0.31 | -0.44 | -0.50 | -0.37        | -0.38 | -0.42 | -0.41 | -0.15          | -0.07 | -0.13 | -0.15 |  |
|        |          | EF            | 121   | -0.35          | -0.29 | -0.36 | -0.39 | -0.32        | -0.31 | -0.34 | -0.32 | 0.02           | 0.03  | 0.01  | 0.00  |  |
|        | SF       | 120           | -0.50 | -0.43          | -0.55 | -0.55 | -0.32 | -0.30        | -0.36 | -0.34 | -0.13 | -0.15          | -0.17 | -0.15 |       |  |

|  |                              |     |       |       |       |       |       |       |       |       |       |       |       |       |
|--|------------------------------|-----|-------|-------|-------|-------|-------|-------|-------|-------|-------|-------|-------|-------|
|  | FA                           | 121 | 0.44  | 0.37  | 0.48  | 0.50  | 0.46  | 0.44  | 0.49  | 0.48  | 0.01  | 0.03  | 0.06  | 0.04  |
|  | PA                           | 121 | 0.32  | 0.24  | 0.34  | 0.35  | 0.31  | 0.31  | 0.34  | 0.32  | 0.02  | -0.06 | -0.02 | 0.04  |
|  | Concern                      |     |       |       |       |       |       |       |       |       |       |       |       |       |
|  | QL                           | 120 | -0.48 | -0.45 | -0.52 | -0.51 | -0.35 | -0.34 | -0.36 | -0.36 | -0.14 | -0.12 | -0.16 | -0.15 |
|  | SF                           | 120 | -0.53 | -0.48 | -0.58 | -0.57 | -0.35 | -0.35 | -0.40 | -0.37 | -0.12 | -0.10 | -0.14 | -0.13 |
|  | PA                           | 120 | 0.39  | 0.33  | 0.41  | 0.42  | 0.27  | 0.31  | 0.29  | 0.27  | 0.12  | -0.03 | 0.06  | 0.13  |
|  | Global Health                |     |       |       |       |       |       |       |       |       |       |       |       |       |
|  | QL                           | 120 | -0.49 | -0.45 | -0.53 | -0.52 | -0.31 | -0.31 | -0.33 | -0.32 | -0.19 | -0.16 | -0.21 | -0.20 |
|  | PF                           | 120 | -0.32 | -0.20 | -0.31 | -0.35 | -0.29 | -0.29 | -0.31 | -0.29 | -0.10 | -0.01 | -0.11 | -0.10 |
|  | PA                           | 120 | 0.25  | 0.18  | 0.25  | 0.27  | 0.28  | 0.31  | 0.31  | 0.29  | -0.01 | -0.12 | -0.06 | -0.02 |
|  | Change in Performance Status |     |       |       |       |       |       |       |       |       |       |       |       |       |
|  | QL                           | 121 | -0.23 | -0.17 | -0.26 | -0.25 | -0.31 | -0.27 | -0.38 | -0.36 | 0.06  | 0.07  | 0.10  | 0.10  |

6

|  |               |     |       |       |       |       |       |       |       |       |       |       |       |       |
|--|---------------|-----|-------|-------|-------|-------|-------|-------|-------|-------|-------|-------|-------|-------|
|  | Function      |     |       |       |       |       |       |       |       |       |       |       |       |       |
|  | QL            | 107 | -0.38 | -0.38 | -0.48 | -0.46 | -0.32 | -0.23 | -0.32 | -0.36 | -0.01 | -0.03 | -0.03 | -0.03 |
|  | PF            | 107 | -0.31 | -0.22 | -0.34 | -0.40 | -0.39 | -0.34 | -0.42 | -0.44 | 0.05  | 0.06  | 0.03  | 0.02  |
|  | RF            | 107 | -0.35 | -0.31 | -0.46 | -0.45 | -0.37 | -0.38 | -0.44 | -0.41 | 0.03  | 0.06  | 0.02  | -0.02 |
|  | EF            | 107 | -0.23 | -0.12 | -0.24 | -0.30 | -0.30 | -0.22 | -0.29 | -0.34 | 0.12  | 0.13  | 0.11  | 0.10  |
|  | FA            | 107 | 0.29  | 0.26  | 0.37  | 0.39  | 0.30  | 0.26  | 0.33  | 0.34  | 0.01  | 0.03  | 0.05  | 0.06  |
|  | SL            | 106 | 0.23  | 0.19  | 0.32  | 0.33  | 0.32  | 0.34  | 0.41  | 0.36  | -0.12 | -0.08 | -0.07 | -0.08 |
|  | Concern       |     |       |       |       |       |       |       |       |       |       |       |       |       |
|  | QL            | 111 | -0.41 | -0.39 | -0.44 | -0.44 | -0.28 | -0.25 | -0.29 | -0.30 | -0.08 | -0.08 | -0.08 | -0.08 |
|  | PF            | 111 | -0.39 | -0.26 | -0.37 | -0.41 | -0.30 | -0.30 | -0.32 | -0.34 | -0.11 | -0.01 | -0.07 | -0.10 |
|  | RF            | 111 | -0.41 | -0.35 | -0.45 | -0.45 | -0.29 | -0.35 | -0.36 | -0.34 | -0.09 | 0.02  | -0.04 | -0.08 |
|  | EF            | 111 | -0.40 | -0.26 | -0.38 | -0.42 | -0.43 | -0.39 | -0.46 | -0.46 | 0.11  | 0.11  | 0.11  | 0.13  |
|  | CF            | 111 | -0.22 | -0.16 | -0.21 | -0.23 | -0.20 | -0.14 | -0.21 | -0.21 | -0.01 | 0.03  | 0.01  | 0.00  |
|  | SF            | 110 | -0.50 | -0.41 | -0.57 | -0.53 | -0.32 | -0.25 | -0.33 | -0.34 | -0.12 | -0.12 | -0.13 | -0.12 |
|  | Global Health |     |       |       |       |       |       |       |       |       |       |       |       |       |
|  | QL            | 111 | -0.48 | -0.47 | -0.55 | -0.54 | -0.42 | -0.40 | -0.44 | -0.44 | 0.01  | 0.00  | -0.01 | -0.01 |
|  | PF            | 111 | -0.32 | -0.18 | -0.32 | -0.40 | -0.37 | -0.31 | -0.36 | -0.41 | 0.02  | 0.09  | 0.01  | -0.01 |

|                              |     |       |       |       |       |       |       |       |       |       |       |       |       |
|------------------------------|-----|-------|-------|-------|-------|-------|-------|-------|-------|-------|-------|-------|-------|
| RF                           | 111 | -0.39 | -0.33 | -0.45 | -0.46 | -0.42 | -0.41 | -0.45 | -0.44 | 0.05  | 0.13  | 0.08  | 0.01  |
| EF                           | 111 | -0.27 | -0.16 | -0.28 | -0.32 | -0.40 | -0.35 | -0.42 | -0.44 | 0.19  | 0.16  | 0.17  | 0.19  |
| SF                           | 110 | -0.39 | -0.33 | -0.46 | -0.46 | -0.33 | -0.29 | -0.35 | -0.36 | -0.02 | -0.01 | -0.04 | -0.03 |
| FA                           | 111 | 0.30  | 0.24  | 0.33  | 0.36  | 0.30  | 0.24  | 0.30  | 0.33  | 0.02  | 0.03  | 0.02  | 0.05  |
| PA                           | 110 | 0.40  | 0.27  | 0.42  | 0.47  | 0.35  | 0.33  | 0.37  | 0.36  | -0.03 | -0.10 | -0.06 | -0.01 |
| SL                           | 110 | 0.23  | 0.15  | 0.25  | 0.26  | 0.29  | 0.29  | 0.33  | 0.31  | -0.09 | -0.11 | -0.09 | -0.08 |
| AP                           | 111 | 0.35  | 0.29  | 0.41  | 0.40  | 0.31  | 0.30  | 0.34  | 0.33  | 0.02  | 0.03  | 0.04  | 0.04  |
| Change in Performance Status |     |       |       |       |       |       |       |       |       |       |       |       |       |
| PF                           | 111 | -0.15 | -0.11 | -0.13 | -0.14 | -0.30 | -0.25 | -0.31 | -0.31 | 0.12  | 0.15  | 0.18  | 0.16  |
| RF                           | 111 | -0.23 | -0.20 | -0.23 | -0.24 | -0.25 | -0.25 | -0.30 | -0.29 | 0.03  | 0.04  | 0.06  | 0.05  |
| CO                           | 111 | 0.11  | 0.11  | 0.16  | 0.15  | 0.26  | 0.30  | 0.38  | 0.34  | -0.21 | -0.23 | -0.34 | -0.29 |
| DI                           | 111 | -0.20 | -0.21 | -0.33 | -0.26 | -0.21 | -0.21 | -0.30 | -0.27 | 0.04  | 0.02  | 0.08  | 0.06  |

Legend for Supplementary Table 2:

Pe, Pearson's correlation coefficient; Sp, Spearman's rank correlation coefficient; Pc, Polychoric correlation coefficient; Ps, Polyserial correlation coefficient; QL, global quality of life; PF, physical function; RF, role function; EF, emotional function; SF, social function; FA, fatigue; NV, nausea and vomiting; PA, pain; DY, dyspnea; SL, insomnia; AP, appetite loss; CO, constipation; DI, diarrhea

Supplementary Table 3. Estimated differences, p-values, and effect sizes in each pair of anchor and scale

| Months | Anchor              | Scale         | Improvement                 |                     |                     | Deterioration               |                     |              |       |
|--------|---------------------|---------------|-----------------------------|---------------------|---------------------|-----------------------------|---------------------|--------------|-------|
|        |                     |               | Estimate (95% CI)           | P-value             | Effect size         | Estimate (95% CI)           | P-value             | Effect size  |       |
| 2      | Function            | QL            | No MID                      |                     |                     | -5.49 (-17.7, 6.74)         | 0.375               | -0.22        |       |
|        |                     | PF            | 7.37 (-1.76, 16.50)         | 0.112               | 0.31                | <b>-8.27 (-15.1, -1.48)</b> | <b>0.018</b>        | <b>-0.35</b> |       |
|        |                     | RF            | 6.94 (-7.03, 20.92)         | 0.326               | 0.23                | -10.3 (-20.6, 0.13)         | 0.053               | -0.34        |       |
|        |                     | SF            | No MID                      |                     |                     | No MID                      |                     |              |       |
|        |                     | FA            | No MID                      |                     |                     | 6.07 (-3.36, 15.50)         | 0.204               | 0.22         |       |
|        |                     | DY            | No MID                      |                     |                     | 8.58 (-2.77, 19.92)         | 0.137               | 0.28         |       |
|        |                     | AP            | -10.1 (-32.9, 12.74)        | 0.383               | -0.31               | No MID                      |                     |              |       |
|        | Concern             | QL            | 7.58 (-5.72, 20.88)         | 0.261               | 0.30                | -5.46 (-18.8, 7.83)         | 0.417               | -0.21        |       |
|        |                     | Global Health |                             |                     |                     |                             |                     |              |       |
|        | Function            | QL            | 6.23 (-1.09, 13.55)         | 0.094               | 0.26                | <b>-11.9 (-23.2, -0.58)</b> | <b>0.040</b>        | <b>-0.47</b> |       |
|        |                     | PF            | No MID                      |                     |                     | -5.90 (-12.5, 0.71)         | 0.080               | -0.25        |       |
|        |                     | RF            | No MID                      |                     |                     | <b>-16.9 (-26.8, -7.09)</b> | <b>&lt;.001</b>     | <b>-0.57</b> |       |
|        |                     | SF            | 10.68 (-1.06, 22.42)        | 0.074               | 0.38                | -5.15 (-14.6, 4.31)         | 0.283               | -0.23        |       |
|        |                     | FA            | -7.26 (-18.8, 4.32)         | 0.217               | -0.33               | No MID                      |                     |              |       |
|        |                     | NV            | -8.38 (-17.8, 1.04)         | 0.081               | -0.32               | -7.95 (-18.6, 2.65)         | 0.140               | -0.29        |       |
|        |                     | PA            | <b>-13.3 (-25.1, -1.52)</b> | <b>0.027</b>        | <b>-0.43</b>        | <b>9.24 (0.04, 18.45)</b>   | <b>0.049</b>        | <b>0.34</b>  |       |
|        |                     | DY            | No MID                      |                     |                     | 7.14 (-3.32, 17.60)         | 0.179               | 0.32         |       |
|        |                     | AP            | -9.55 (-27.6, 8.46)         | 0.296               | -0.30               | 5.90 (-2.61, 14.42)         | 0.172               | 0.22         |       |
|        |                     | 4             | Function                    | QL                  | 7.08 (-6.72, 20.87) | 0.311                       | 0.28                | No MID       |       |
|        | PF                  |               |                             | 7.78 (-0.91, 16.47) | 0.079               | 0.33                        | -6.84 (-14.0, 0.27) | 0.059        | -0.29 |
| EF     | No MID              |               |                             |                     |                     | No MID                      |                     |              |       |
| SF     | 6.77 (-7.66, 21.20) |               |                             | 0.353               | 0.24                | No MID                      |                     |              |       |
|        |                     |               |                             |                     |                     |                             |                     |              |       |

|   |                              |                            |              |             |                             |              |              |
|---|------------------------------|----------------------------|--------------|-------------|-----------------------------|--------------|--------------|
|   | FA                           | -6.84 (-18.9, 5.23)        | 0.263        | -0.25       | 8.08 (-1.80, 17.96)         | 0.108        | 0.29         |
|   | PA                           | No MID                     |              |             | No MID                      |              |              |
|   | Concern                      |                            |              |             |                             |              |              |
|   | QL                           | 8.17 (-3.51, 19.86)        | 0.168        | 0.32        | No MID                      |              |              |
|   | CF                           | No MID                     |              |             | No MID                      |              |              |
|   | SF                           | 10.11 (-1.52, 21.73)       | 0.088        | 0.36        | <b>-12.2 (-24.3, -0.21)</b> | <b>0.046</b> | <b>-0.44</b> |
|   | PA                           | No MID                     |              |             | 11.23 (-0.50, 22.96)        | 0.060        | 0.43         |
|   | Global Health                |                            |              |             |                             |              |              |
|   | QL                           | No MID                     |              |             | -10.5 (-21.6, 0.64)         | 0.064        | -0.41        |
|   | PF                           | 7.29 (-0.31, 14.89)        | 0.060        | 0.31        | No MID                      |              |              |
|   | PA                           | No MID                     |              |             | <b>11.72 ( 1.50, 21.94)</b> | <b>0.025</b> | <b>0.44</b>  |
|   | Change in Performance Status |                            |              |             |                             |              |              |
|   | QL                           | No MID                     |              |             | No MID                      |              |              |
| 6 | Function                     |                            |              |             |                             |              |              |
|   | QL                           | No MID                     |              |             | <b>-18.5 (-33.9, -3.21)</b> | <b>0.019</b> | <b>-0.73</b> |
|   | PF                           | No MID                     |              |             | <b>-13.0 (-21.8, -4.19)</b> | <b>0.004</b> | <b>-0.55</b> |
|   | RF                           | No MID                     |              |             | <b>-20.2 (-34.2, -6.10)</b> | <b>0.006</b> | <b>-0.67</b> |
|   | EF                           | No MID                     |              |             | -10.7 (-22.3, 0.86)         | 0.069        | -0.49        |
|   | FA                           | No MID                     |              |             | 11.91 (-0.45, 24.27)        | 0.059        | 0.43         |
|   | SL                           | No MID                     |              |             | <b>23.25 ( 6.30, 40.20)</b> | <b>0.008</b> | <b>0.77</b>  |
|   | Concern                      |                            |              |             |                             |              |              |
|   | QL                           | 11.19 (-4.12, 26.49)       | 0.150        | 0.44        | -8.98 (-25.5, 7.53)         | 0.282        | -0.35        |
|   | PF                           | No MID                     |              |             | -9.11 (-19.3, 1.03)         | 0.078        | -0.39        |
|   | RF                           | <b>21.12 (6.88, 35.37)</b> | <b>0.004</b> | <b>0.71</b> | -15.2 (-30.5, 0.21)         | 0.053        | -0.51        |
|   | EF                           | <b>11.55 (0.39, 22.71)</b> | <b>0.043</b> | <b>0.53</b> | -7.13 (-19.2, 4.91)         | 0.242        | -0.33        |
|   | SF                           | No MID                     |              |             | <b>-13.8 (-27.3, -0.29)</b> | <b>0.045</b> | <b>-0.50</b> |
|   | Global Health                |                            |              |             |                             |              |              |
|   | QL                           | 12.14 (-2.03, 26.32)       | 0.092        | 0.48        | -5.45 (-18.0, 7.15)         | 0.392        | -0.21        |
|   | PF                           | 7.98 (-0.18, 16.14)        | 0.055        | 0.34        | No MID                      |              |              |



|     |                              |                             |              |              |                             |              |              |
|-----|------------------------------|-----------------------------|--------------|--------------|-----------------------------|--------------|--------------|
|     | RF                           | 18.95 ( 5.99, 31.90)        | 0.005        | 0.63         | No MID                      |              |              |
|     | EF                           | 5.52 (-6.11, 17.15)         | 0.348        | 0.25         | No MID                      |              |              |
|     | SF                           | 7.26 (-5.29, 19.82)         | 0.253        | 0.26         | -10.9 (-22.1, 0.26)         | 0.055        | -0.39        |
|     | FA                           | -8.31 (-19.7, 3.12)         | 0.152        | -0.30        | No MID                      |              |              |
|     | PA                           | <b>-14.3 (-26.5, -2.12)</b> | <b>0.022</b> | <b>-0.54</b> | No MID                      |              |              |
|     | SL                           | <b>-20.4 (-36.6, -4.15)</b> | <b>0.014</b> | <b>-0.67</b> | No MID                      |              |              |
|     | AP                           | No MID                      |              |              | 8.55 (-7.55, 24.64)         | 0.294        | 0.27         |
|     | Change in Performance Status |                             |              |              |                             |              |              |
|     | PF                           | 5.32 (-8.77, 19.41)         | 0.456        | 0.27         | <b>-9.25 (-18.2, -0.32)</b> | <b>0.042</b> | <b>-0.46</b> |
|     | RF                           | 9.23 (-12.1, 30.51)         | 0.392        | 0.35         | <b>-14.3 (-27.8, -0.85)</b> | <b>0.037</b> | <b>-0.55</b> |
|     | CO                           | No MID                      |              |              | No MID                      |              |              |
|     | DI                           | No MID                      |              |              | -4.12 (-15.3, 7.07)         | 0.467        | -0.21        |
| All | Function                     |                             |              |              |                             |              |              |
|     | QL                           | <b>11.22 (3.69, 18.75)</b>  | <b>0.004</b> | <b>0.44</b>  | -5.76 (-13.8, 2.32)         | 0.162        | -0.23        |
|     | PF                           | 4.83 (-0.37, 10.03)         | 0.069        | 0.21         | No MID                      |              |              |
|     | RF                           | No MID                      |              |              | <b>-8.38 (-16.2, -0.61)</b> | <b>0.034</b> | <b>-0.28</b> |
|     | Concern                      |                             |              |              |                             |              |              |
|     | QL                           | No MID                      |              |              | <b>-7.72 (-14.5, -0.93)</b> | <b>0.026</b> | <b>-0.30</b> |
|     | EF                           | No MID                      |              |              | <b>-5.25 (-10.1, -0.36)</b> | <b>0.035</b> | <b>-0.24</b> |
|     | Global Health                |                             |              |              |                             |              |              |
|     | QL                           | No MID                      |              |              | <b>-10.4 (-16.7, -4.00)</b> | <b>0.001</b> | <b>-0.41</b> |
|     | PF                           | <b>4.84 (0.77, 8.91)</b>    | <b>0.020</b> | <b>0.21</b>  | No MID                      |              |              |
|     | RF                           | <b>6.77 (1.25, 12.29)</b>   | <b>0.016</b> | <b>0.23</b>  | <b>-6.30 (-12.2, -0.36)</b> | <b>0.038</b> | <b>-0.21</b> |
|     | SF                           | No MID                      |              |              | <b>-7.32 (-12.5, -2.12)</b> | <b>0.006</b> | <b>-0.26</b> |
|     | FA                           | No MID                      |              |              | <b>6.59 ( 2.30, 10.88)</b>  | <b>0.003</b> | <b>0.24</b>  |
|     | PA                           | <b>-6.69 (-12.4, -0.99)</b> | <b>0.021</b> | <b>-0.25</b> | No MID                      |              |              |

Legend for Supplementary Table 3:

The mean change method was applied for months 2, 4, and 6; the GEE method was applied for overall timepoints. Estimates with P < 0.05 are shown in **bold**.

QL, global quality of life; PF, physical function; RF, role function; EF, emotional function; SF, social function; FA, fatigue; NV, nausea and vomiting; PA, pain; DY, dyspnea; SL, insomnia; AP, appetite loss; CO, constipation; DI, diarrhea
